# Supplementary material for: Shifting Paradigms: A Deep Dive Into Public Perceptions of Gender-affirming Surgery
Source: PubMed Central journal article supplement — Plast Reconstr Surg Glob Open. 2025 Jan 21;13(1):e6472. doi: 10.1097/GOX.0000000000006472 (PMC11749661; doi:10.1097/gox.0000000000006472), 2025-01-21
Supplement: gox-13-e6472-s001.pdf [file gox-13-e6472-s001.pdf]

**Supplemental Digital Content 1.** Complete survey with questions and answer choices.

1. What is your Prolific ID?
2. Please indicate your age.
  - <21
  - 21-25
  - 26-30
  - 31-35
  - 36-40
  - >41
3. Please indicate your gender.
  - Male
  - Female
  - Transgender Female
  - Transgender Male
  - Non-binary
  - Prefer not to say
4. What region of the United States do you currently live in?
  - Northeast
  - South
  - Midwest
  - West
5. Please indicate the race(s) you identify with. (Select all that apply)
  - White or Caucasian
  - Black or African American
  - American Indian/Native American or Alaska Native
  - Asian
  - Native Hawaiian or Other Pacific Islander
  - Other
  - Prefer not to say
6. Are you of Spanish, Hispanic, or Latino origin?
  - Yes
  - No
7. **\*\*Do you identify as LGBTQIA+?**
  - Yes
  - No
  - Prefer not to say
8. How familiar are you with the concept of gender-affirming surgery?
  - Not familiar at all

- Slightly familiar
- Moderately familiar
- Very familiar
- Extremely familiar

9. Which surgical specialty do you think most commonly offers gender-affirming surgery?

- General Surgery
- Orthopedic Surgery
- Plastic Surgery
- Vascular Surgery
- Neurosurgery
- Oro-Maxillo-Facial Surgery / Head and Neck Surgery

10. Do you know anyone who has undergone gender-affirming surgery?

- Yes
- No

11. Have you had any conversations or discussions about gender-affirming surgery in your social circles (family, friends, colleagues, etc.)?

- Yes, frequently
- Yes, occasionally
- No, not at all

12. How comfortable are you discussing gender-affirming surgery with others?

- Very uncomfortable
- Uncomfortable
- Neutral
- Comfortable
- Very comfortable

13. How would you rate the overall level of public awareness and understanding of gender-affirming surgery in your community?

- Very low
- Low
- Moderate
- High
- Very high

14. How well do you think healthcare professionals are trained to provide gender-affirming care and support?

- Not at all well
- Not well
- Neutral
- Somewhat well
- Very well

15. Do you think there should be more education and awareness initiatives about gender-affirming surgery in schools and educational institutions?

- Yes
- No
- Not sure

16. What factors do you believe contribute to the perception of gender-affirming surgery in society? (Select all that apply)

- Media representation
- Education and awareness campaigns
- Cultural or religious beliefs
- Social norms
- Personal experiences
- Legal and policy framework

17. Where have you seen or learned of gender-affirming surgery?

- Search engine
- Social media
- Television
- Personal experience
- Not applicable (no familiarity with gender-affirming surgery)

18. How do you perceive the accessibility of gender-affirming surgery in the United States?

- Very Inaccessible
- Inaccessible
- Neither Inaccessible Nor Accessible
- Accessible
- Very Accessible

19. How important do you think it is for society to recognize and support individuals who undergo gender-affirming surgery?

- Not at all important
- Slightly important
- Moderately important
- Very important
- Extremely important

20. In your personal opinion: Do you think gender-affirming surgery should be covered by public or private health insurance?

- Yes, both should cover it
- Yes, public should cover it
- Yes, private should cover it
- No
- I'm not sure

21. Please indicate to what extent you agree with the following statement: “Gender-affirming surgery is performed to help individuals align with their gender identity.”

- Strongly Disagree
- Disagree
- Neutral
- Agree
- Strongly Agree

22. Please indicate to what extent you agree with the following statement: “Gender-affirming surgery has a positive impact on an individual’s mental health and well-being.”

- Strongly Disagree
- Disagree
- Neutral
- Agree
- Strongly Agree

23. Please indicate to what extent you agree with the following statement: “Geographical location plays a role in access to gender-affirming care.”

- Strongly Disagree
- Disagree
- Neutral
- Agree
- Strongly Agree

24. Please indicate to what extent you agree with the following statement: “Gender-affirming surgery is a medical necessity for individuals with gender dysphoria.”

- Strongly Disagree
- Disagree
- Neutral
- Agree
- Strongly Agree

25. Do you think that gender-affirming surgery should be more widely available?

- Yes
- No
- I’m not sure

26. In your personal opinion, what should be the minimum age requirement for individuals seeking gender-affirming surgery?

- Please give a number.

27. How safe do you perceive gender-affirming surgery?

- Very Unsafe
- Unsafe
- Neither Unsafe Nor Safe
- Safe

- Very Safe

28. Do you believe that individuals should have the right to access gender-affirming surgery without restrictions?

- Strongly Disagree
- Disagree
- Neutral
- Agree
- Strongly Agree

29. What factors could pose barriers for individuals seeking gender-affirming surgery? (Select all that apply)

- High cost
- Lack of qualified healthcare providers
- Long waiting lists
- Stigma and discrimination
- Legal or policy restrictions

30. How do you perceive the impact of media representation on public understanding and acceptance of gender-affirming surgery?

- Very negative
- Negative
- Neutral
- Positive
- Very positive
